# Supplementary figures and images for: Capsaicin Mediates Cell Cycle Arrest and Apoptosis in Human Colon Cancer Cells via Stabilizing and Activating p53
Source: PubMed Central journal article supplement — Int J Biol Sci. 2014 Feb 21;10(3):285–95. doi: 10.7150/ijbs.7730 (PMC3957084; doi:10.7150/ijbs.7730), 2014-02-21

# Supplementary Figure 1(A-B)

## A

HCT116

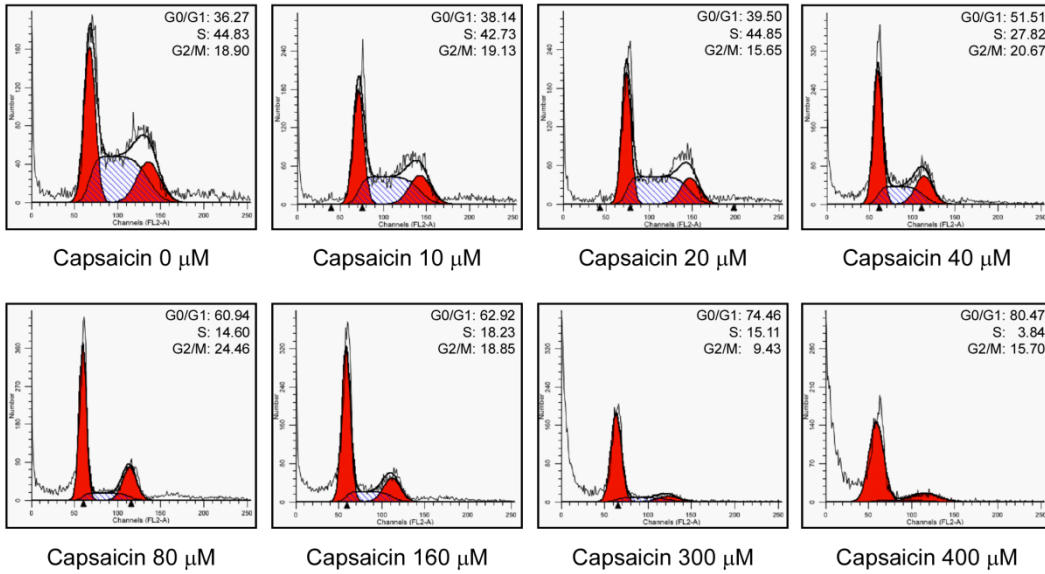

## B

LoVo

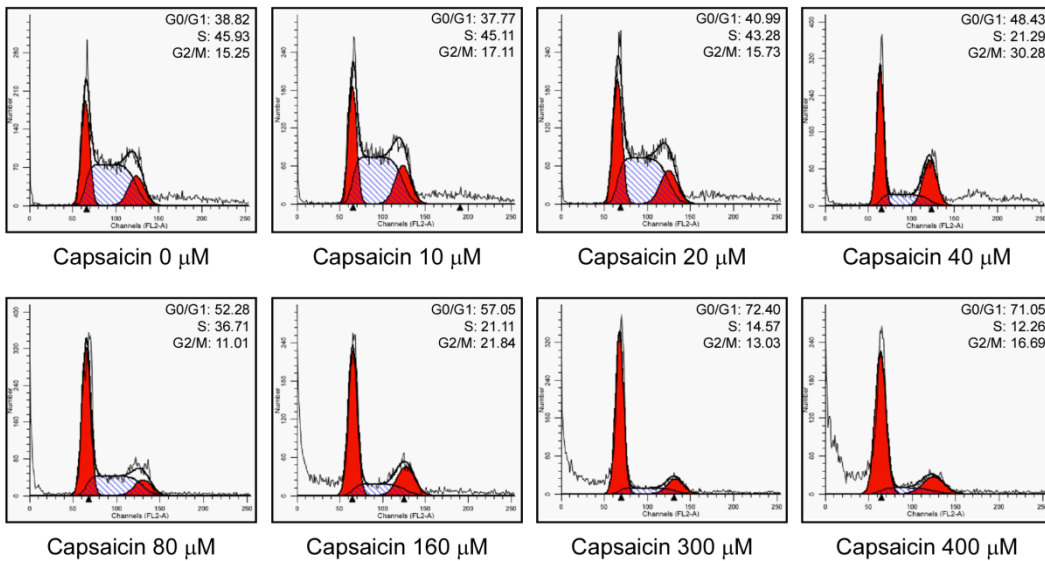

Supplementary Figure 1(C-D)

C

HCT116

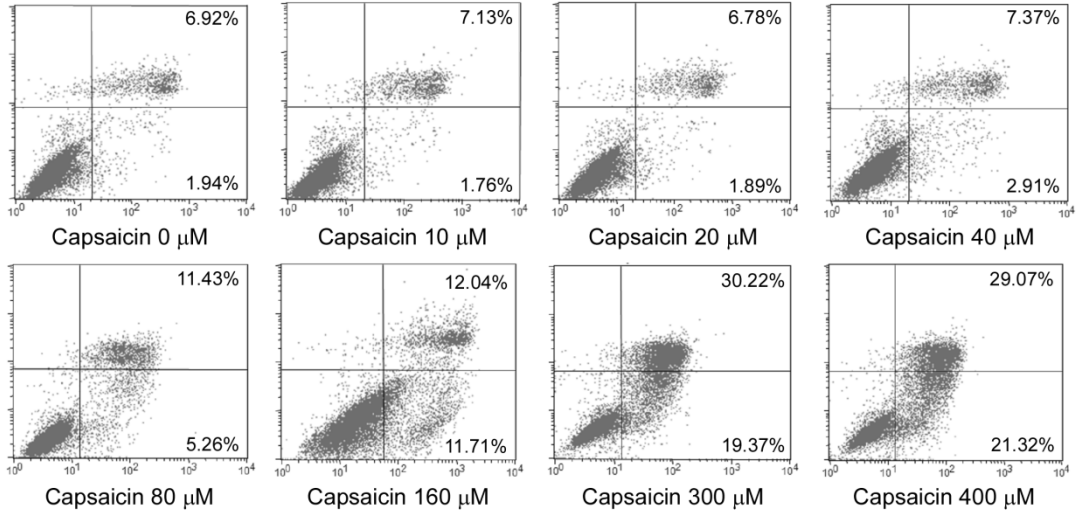

D

LoVo

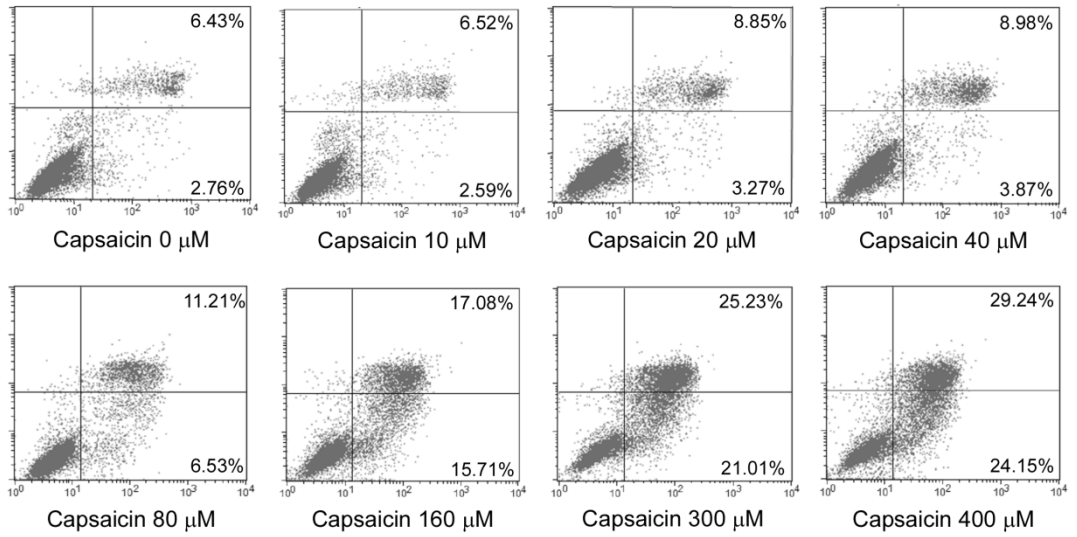

Supplement: ijbsv10p0285s1.pdf [file ijbsv10p0285s1.pdf]
